# Supplementary material for: Correction of matrix effects for As and Se in ICP OES using a Flow Blurring® multiple nebulizer
Source: Royal Society of Chemistry journal article supplement (doi:10.1039/c2ja30231d), 2012-01-01
Supplement: c2ja30231d.pdf [file c2ja30231d.pdf]

1 Supplementary Material (ESI) for Journal of Analytical Atomic Spectrometry  
2 This journal is © The Royal Society of Chemistry 2012

3  
4 **SUPPORTING INFORMATION**

5  
6 **Correction of matrix effects for As and Se in ICP OES using a *Flow***  
7 ***Blurring*<sup>®</sup> multiple nebulizer**

8  
9 Catarinie D. Pereira<sup>a</sup>, Miguel Ángel Aguirre<sup>b</sup>, Joaquim A. Nóbrega<sup>a</sup>, Montserrat Hidalgo<sup>b</sup>,  
10 Antonio Canals<sup>\*b</sup>

11  
12 <sup>a</sup>*Departamento de Química, Universidade Federal de São Carlos, PO Box 676, 13560-970 São Carlos,*  
13 *SP, Brazil.*

14  
15 <sup>b</sup>*Departamento de Química Analítica, Nutrición y Bromatología e Instituto Universitario de Materiales,*  
16 *Universidad de Alicante, Apdo. 99, Alicante E-03080, Spain. E-mail: [a.canals@ua.es](mailto:a.canals@ua.es)*

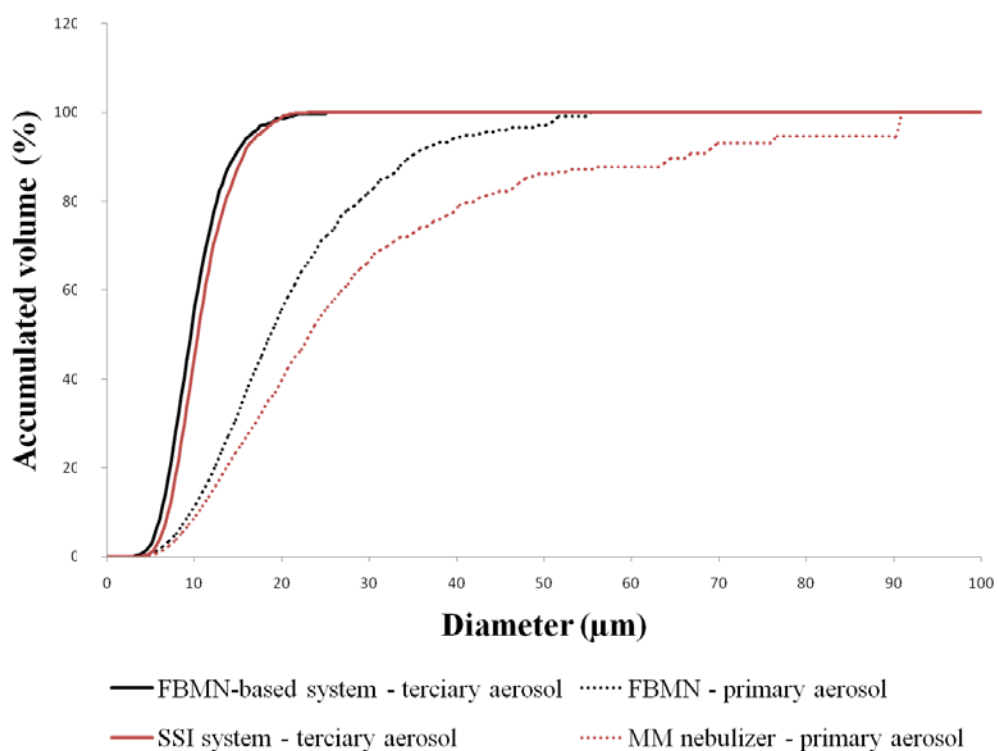

**Fig. S1.** Accumulated percent volume produced by: FBMN and MM nebulizers (primary aerosol) and FBMN-based and SSI systems (tertiary aerosol).

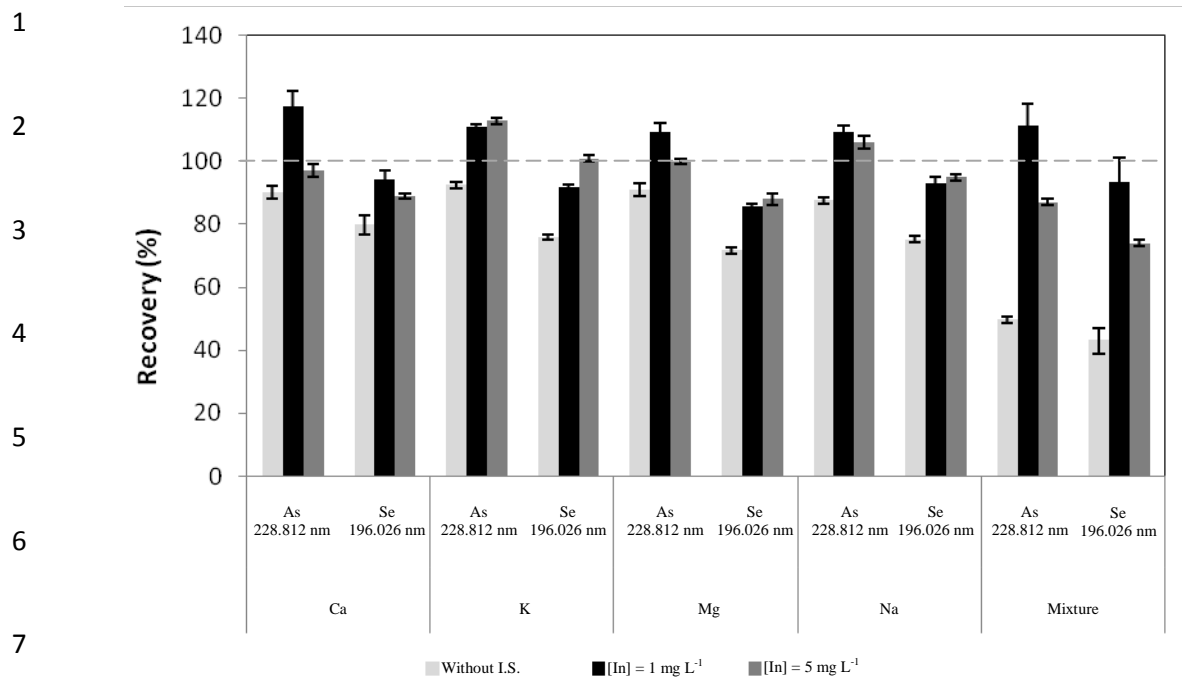

8 **Fig. S2.** Recovery values for 5 mg L<sup>-1</sup> of As and Se obtained using external calibration  
9 (without I.S.) and conventional internal standardization in different media with SSI  
10 system. Conditions: concentration of concomitant – 0.100 mol L<sup>-1</sup>.  
11
